## 9 **ABSTRACT**

10 The hygiene hypothesis proposes that declining exposure to microbial influences early in life is  
11 implicated in the rising trend of allergy and asthma in high-income societies. Approximately 8%  
12 of Americans have been diagnosed with asthma, representing 25 million people, and  
13 understanding how the human microbiome affects asthma could help guide exposure  
14 recommendations or microbe-based therapeutics. *Toxoplasma gondii* is a common gastro-  
15 intestinal microorganism that may modulate immune function. We used a cross-sectional study  
16 design to examine a public database of U.S. residents aged 6 to 80 years or older from the 2012-  
17 2014 survey cycles of the American National Health and Nutrition Examination Survey  
18 (NHANES) to construct an ordinal logistic regression model of the relationship between *T.*  
19 *gondii* infection and asthma. There was no significant relationship detected between *T. gondii*  
20 infection and asthma when the model was adjusted for key demographic factors.

21 **The association between *Toxoplasma gondii* infection and asthma in the United States: A**  
22 **cross-sectional survey analysis.**

23 Asthma is a complex syndrome characterized by increased bronchial reactivity and airway  
24 obstruction and can result in death (1). Approximately 8% of Americans have been diagnosed  
25 with asthma, representing 25 million people (1–2). Between 1980 and 2011, the prevalence of  
26 asthma in the United States (U.S.) more than doubled and similar trends have been observed in  
27 other highly industrialized nations (2,4).

28 The hygiene hypothesis proposes that declining exposure to microbial influences early in life is  
29 implicated in the rising trend of allergy and asthma in high-income societies. Children who grow  
30 up on a farm are at lower risk for asthma and asthma risk decreases as the number of older  
31 siblings increases, possibly due to increased exposure to microorganisms and their products  
32 through contact with older siblings (2,5).

33 Understanding how the human microbiome is shaped and affects health can provide  
34 mechanistic explanation to the hygiene hypothesis, which could help guide exposure  
35 recommendations or microbe-based therapeutics for disease prevention and modification (5,6).

36 A ubiquitous gastro-intestinal microorganism is *Toxoplasma gondii*, an obligate intracellular  
37 protozoan whose definitive host is cats. People become infected with *T. gondii* through indirect  
38 fecal-oral transmission or consumption of undercooked meat. About 12% of the U.S. population  
39 is infected, and in some countries, prevalence is as high as 60% (7,8). Despite recognized  
40 impacts on the mammalian immune response, the relationship between *T. gondii* infection and  
41 asthma has not been well investigated (6,8). In the current study, we quantify the association  
42 between *T. gondii* infection and asthma in the U.S. population.

43

## 44 **METHODS**

45 We used a cross-sectional study design to examine a public database of U.S. residents aged 6 to  
46 80 years or older from the 2012-2014 survey cycles of the American National Health and  
47 Nutrition Examination Survey (NHANES). This is a continuous survey based on a stratified  
48 multistage clustered probability design to select a representative sample of the civilian,  
49 noninstitutionalized U.S. population (9). Identification of individuals is not possible from these  
50 data. Only subjects 6 years of age or older were tested for *T. gondii*. Demographic,  
51 socioeconomic, and health-related information were taken from the NHANES Questionnaire,  
52 and serological data from the NHANES surplus sera program (2012-2014). The data were  
53 accessed on October 16<sup>th</sup>, 2023.

54 The University of British Columbia's Policy LR9, item 7.10.3, on studies involving human  
55 participants and Article 2.2 of the Tri-Council Policy Statement on Ethical Conduct for Research  
56 Involving Humans provide ethical support for this study (10,11). The NHANES protocols were  
57 approved by the National Center for Health Statistics institutional review board, and written  
58 informed consent was obtained from all participants (9).

59 The response rates for in-home interviews in 2011-2012 and 2013-2014 were 72.6 and 71.0%,  
60 respectively (9). Of the 19,931 persons interviewed, 16,733 (84%) were  $\geq 6$  years old. Of these  
61 16,733 interviewed subjects, 12,677 (76%) had sera tested for *T. gondii* antibodies. Three of  
62 these subjects were excluded due to missing IgG results, and an additional 45 were excluded  
63 because they most likely had acute infections (exposure occurred within the last two weeks); the  
64 cross-sectional NHANES data would probably not capture the effects of an acute infection (12).  
65 Nine subjects were excluded because the outcome of asthma was missing, resulting in an  
66 analytic sample of  $n = 12,620$  (Fig 1, Table 1).

67

68 **Fig 1. Flowchart representing the process for selecting the analytic sample from the**  
 69 **NHANES 2012-2014 survey cycle data to evaluate the association between *Toxoplasma***  
 70 ***gondii* infection and asthma in the U.S.**

71 **Table 1. Sample characteristics (frequencies and percentages) of individuals from the**  
 72 **NHANES 2011-2014 survey cycles and their *Toxoplasma gondii* infection status, stratified**  
 73 **by the outcome self-reported asthma severity (0 = “never been told you have asthma”; 1 =**  
 74 **“told you have asthma”; 2 = “told you have asthma and still have asthma”; 3 = “still have**  
 75 **asthma and had an asthma attack in the past year”; and 4 = “had an emergency care visit**  
 76 **for asthma in the past year). Rao-Scott Chi-squared tested for differences between asthma**  
 77 **severity and the identified confounders; statistically significant p-values (p <0.05) are**  
 78 **bolded.**

|                                  | Asthma severity    |                    |                    |                    |                    |                    | p-<br>test <sup>b</sup> |
|----------------------------------|--------------------|--------------------|--------------------|--------------------|--------------------|--------------------|-------------------------|
|                                  | Overall            | 0                  | 1                  | 2                  | 3                  | 4                  |                         |
| n                                | 12620              | 10544              | 839                | 615                | 424                | 198                |                         |
| <b><i>T. gondii</i></b>          | n (%) <sup>a</sup> | n (%) <sup>a</sup> | n (%) <sup>a</sup> | n (%) <sup>a</sup> | n (%) <sup>a</sup> | n (%) <sup>a</sup> | <b>0.140</b>            |
| Positive                         | 1572 (10.8)        | 1365 (11.2)        | 77 (6.5)           | 72 (12.6)          | 43 (10.4)          | 15 (6.3)           |                         |
| Negative                         | 11057(89.2)        | 9179 (88.8)        | 762(93.5)          | 543(87.4)          | 381(89.6)          | 183(93.7)          |                         |
| <b>Gender</b>                    | (%)                | (%)                | (%)                | (%)                | (%)                | (%)                | <b>0.036</b>            |
| female                           | 6416 (51.2)        | 5299 (50.5)        | 398(53.1)          | 334(51.3)          | 260(54.6)          | 125(75.1)          |                         |
| male                             | 48.8               | 49.5               | 46.9               | 48.7               | 45.4               | 24.9               |                         |
| <b>Age</b>                       | n (%)              | n (%)              | n (%)              | n (%)              | n (%)              | n (%)              | <b>0.019</b>            |
| 6-9                              | 1058 (4.8)         | 875 (4.8)          | 53 (3.2)           | 52 (6.4)           | 43 (4.9)           | 35 (12.0)          |                         |
| 10-19                            | 2508 (14.0)        | 1984 (12.6)        | 213(21.4)          | 172(18.7)          | 92 (20.2)          | 47 (25.5)          |                         |
| 20-29                            | 1512(14.6)         | 1217(13.8)         | 150(19.8)          | 67 (14.0)          | 56 (21.6)          | 22 (17.1)          |                         |
| 30-39                            | 1571 (14.2)        | 1318(14.5)         | 125(15.8)          | 63(12.0)           | 37 (8.3)           | 28 (12.5)          |                         |
| 40-49                            | 1527 (15.2)        | 1317 (15.6)        | 81 (15.8)          | 66 (12.1)          | 43 (10.1)          | 20 (12.1)          |                         |
| 50-59                            | 1508 (15.8)        | 1304 (16.4)        | 70 (9.7)           | 59 (15.3)          | 61 (18.2)          | 14 (5.3)           |                         |
| 60-69                            | 1495 (11.8)        | 1266 (11.9)        | 89 (10.1)          | 68 (13.5)          | 53 (12.8)          | 19 (12.5)          |                         |
| 70-79                            | 880 (6.1)          | 758 (6.5)          | 41 (3.9)           | 45 (5.5)           | 26 (2.3)           | 10 (2.4)           |                         |
| 80+                              | 561 (3.5)          | 505 (3.9)          | 17 (0.4)           | 23 (2.5)           | 13 (1.7)           | 3 (0.6)            |                         |
| <b>Poverty index<sup>c</sup></b> |                    |                    |                    |                    |                    |                    |                         |
| (mean (SD))                      | 2.85 (1.68)        | 2.89 (1.67)        | 2.82(1.70)         | 2.60(1.78)         | 2.73(1.68)         | 1.86(1.38)         | <b>0.003</b>            |
| <b>Education</b>                 | n (%)              | n (%)              | n (%)              | n (%)              | n (%)              | n (%)              | 0.132                   |
| <9th                             | 1145 (6.8)         | 1008 (7.2)         | 59 (6.6)           | 44 (4.4)           | 25 (4.3)           | 9 (3.7)            |                         |
| 9-11th                           | 1727 (11.5)        | 1426 (11)          | 128 (14.6)         | 96 (14.7)          | 44 (9.3)           | 33 (16.5)          |                         |

|                         |             |             |            |            |            |            |       |
|-------------------------|-------------|-------------|------------|------------|------------|------------|-------|
| high school             | 2686 (18.1) | 2242 (18.2) | 162 (17.6) | 140 (20.8) | 88 (12.4)  | 54 (25.3)  |       |
| somecollege             | 3626 (31.7) | 2980 (32.0) | 247 (27.4) | 181 (27.3) | 153 (35.2) | 65 (43.2)  |       |
| college                 | 3021 (31.8) | 2549 (31.6) | 206 (33.8) | 134 (32.8) | 102 (38.8) | 30 (11.4)  |       |
| <b># Children</b>       | n (%)       | n (%)       | n (%)      | n (%)      | n (%)      | n (%)      | 0.143 |
| 0                       | 6471 (59.4) | 5459 (60.1) | 415 (54.9) | 314 (61.1) | 210 (58.5) | 73 (34.8)  |       |
| 1                       | 2411 (17.0) | 1985 (16.2) | 175 (20.6) | 112 (14.6) | 97 (24.4)  | 42 (33.3)  |       |
| 2                       | 2208 (15.2) | 1825 (15.3) | 152 (15.3) | 117 (16.5) | 68 (9.8)   | 46 (19.9)  |       |
| 3                       | 1045 (6.2)  | 879 (6.1)   | 62 (7.1)   | 47 (6.5)   | 33 (6.7)   | 24 (9.8)   |       |
| 4+                      | 485 (2.2)   | 396 (2.3)   | 35 (2.0)   | 25 (1.3)   | 16 (0.6)   | 13 (2.2)   |       |
| <b>Race</b>             | n (%)       | n (%)       | n (%)      | n (%)      | n (%)      | n (%)      | 0.024 |
| Hispanic                | 3167 (15.3) | 2721 (15.8) | 194 (14.6) | 133 (11.6) | 68 (8.1)   | 51 (25.1)  |       |
| Black                   | 2768 (10.2) | 2221 (9.9)  | 192 (10.7) | 182 (14.7) | 100 (9.9)  | 73 (17.1)  |       |
| White                   | 4778 (67.3) | 3944 (66.9) | 339 (68.9) | 247 (68.7) | 194 (77.2) | 54 (51.2)  |       |
| Asian                   | 1433 (4.3)  | 1292 (4.6)  | 67 (2.3)   | 35 (3.0)   | 30 (2.2)   | 9 (2.4)    |       |
| other                   | 474 (2.9)   | 366 (2.8)   | 47 (3.5)   | 18 (2.0)   | 32 (2.5)   | 11 (4.2)   |       |
| <b>Country of birth</b> | n (%)       | n (%)       | n (%)      | n (%)      | n (%)      | n (%)      | 0.065 |
| other                   | 3008 (14.8) | 2727 (15.6) | 127 (11.0) | 78 (9.6)   | 48 (10.3)  | 28 (13.5)  |       |
| U.S.                    | 9612 (85.2) | 7817 (84.4) | 712 (89.0) | 537 (90.4) | 376 (89.7) | 170 (86.5) |       |

Data are n (%) unless otherwise stated. <sup>a</sup> Percentages are calculated on complete case data, accounting for complex survey design and survey weights. <sup>b</sup> p-values are calculated using Rao-Scott Chi-squared test. <sup>c</sup> Poverty index of  $\geq 3.5$  indicates a high level of poverty.

79  
80  
81  
82 The exposure variable was infection with *T. gondii*, defined as having IgG antibodies to *T.*  
83 *gondii* above  $\geq 33$  IU/mL. IgG antibodies were measured with the Toxoplasma IgG Enzyme  
84 Immunoassay (Bio-Rad, Redmond, WA) and IgM antibodies with the Platelia Toxo IgM (Bio-  
85 Rad). Test results were expressed as international units (IU/mL) or sample ratios, respectively. If  
86 IgG assay results were missing, the subject was excluded from the analysis (n = 3). If IgG was  
87 positive and IgM was missing, the exposure was counted as “positive”. If IgG was negative ( $< 33$   
88 IU/mL), and IgM was missing, the exposure was counted as “negative”. If IgG was negative, and  
89 IgM was positive (Sample Ratio  $\geq 1$ ) the exposure was categorized as “acute” and excluded from  
90 the analysis (n = 45) (Fig 1)(12).

91 We created a proxy variable representing five levels of asthma severity from five variables in  
92 the Questionnaire. Level 0 indicates “never been told you have asthma”, level 1, “told you have

93 asthma”, level 2, “told you have asthma and still have asthma”, level 3 “still have asthma and  
94 had an asthma attack in the past year” and level 4 “had an emergency care visit for asthma in the  
95 past year”. For comparison, we created a binary outcome variable for asthma based on the  
96 question, “Has a doctor or other health professional ever told you that you have asthma?” “Yes”  
97 or “No”.

98 We selected the minimum sufficient adjusted set of confounders using the modified disjunctive  
99 cause criterion, informed by evidence in the current literature and a directed acyclic graph  
100 (DAG) (Fig 2)(1,7,13–17). As cat ownership is not an important risk factor for *T. gondii*  
101 infection, and pet ownership information was not collected in the 2012-2014 NHANES, cat  
102 ownership was not included as a covariate (18–23). Because the NHANES categorizes subjects  
103 over the age of 80 years as “80+”, we grouped the age variable into decades as follows: “6-9”;  
104 “10-19”; “20-29”; “30-39”; “40-49”; “50-59”; “60-69”; “70-79”; and “80+”. This grouping is  
105 consistent with other analyses of *T. gondii* infection and is a clinically relevant interval for  
106 assessing trends in asthma severity and *T. gondii* seropositivity (7,24,25).

107 **Fig 2. Directed acyclic graph illustrating the relationships amongst the exposure variable**  
108 **“*Toxoplasma gondii*”, the outcome variable “Asthma severity”, and adjusted confounders.**  
109 ***T. gondii* infection is characterized as positive (pos) or negative (neg) and Asthma severity**  
110 **is categorized from 0 to 4, where 0 indicates no asthma and 4 indicates the subject has**  
111 **asthma that caused at least one emergency room visit in the last year. Age is age in years at**  
112 **last birthday. Education refers to the highest level of education attained by the household**  
113 **reference person. Poverty index refers to the poverty index assigned to the household**  
114 **reference person and # Children is the number of children <18 years of age living in the**  
115 **household.**

116  
117 Gender was “male” or “female”. Race was categorized as “Hispanic”, “White”, “Black”,  
118 “Asian”, or “other” according to the respondent’s self-assessment. Country of birth was “U.S.”  
119 or “other”. The education level of the household reference person was categorized as “<9<sup>th</sup>  
120 grade”, “9<sup>th</sup>-11<sup>th</sup> grade”, “high school”, “some college”, or “college completed”. Economic status

121 was defined according to the poverty index of the household reference person and expressed as a  
122 continuous numeric variable (0-5), where a poverty index of  $\geq 3.5$  indicates a high level of  
123 poverty (26). Number of children in the household was 0-3 or greater than 4 (9).

124 It is not clear from the literature if level of education is associated with asthma after adjusting  
125 for income (13,24). We calculated Akaike information criteria (AICs) for the ordinal and logistic  
126 regression models with and without the variable “education of the household reference person”  
127 to evaluate model fit. In both cases, model fit was improved by including the level of education  
128 in the model.

129 We tested for interaction effect between: “age” and “poverty index”, “race” and “poverty  
130 index”; and “poverty index” and “number of children in the household.” There was no  
131 significant interaction between “age” and “poverty index”. We detected significant interaction  
132 ( $p < 0.05$ ) for the latter two combinations and included these interaction terms in the final model.

133 Because *T. gondii* infection and asthma prevalence vary with age (Fig 3), and the relationship  
134 between asthma and atopy could also differ with age (2), we conducted additional ordinal  
135 regression analyses stratified by age category to check for effect modification and calculated the  
136 AIC values to compare model fit (Table 3).

137 **Fig 3. *Toxoplasma gondii* and asthma prevalence by age category in the U.S. non-**  
138 **institutionalized civilian population age 6 years and older. Data is from the NHANES 2011-**  
139 **2014 survey cycles (n=12,620).**



140 **Table 3. Odds ratios (OR) and 95% confidence intervals (CI) for the relationship between**  
 141 ***Toxoplasma gondii* infection status and asthma in the U.S. non-institutionalized civilian**  
 142 **population, stratified by age category. Asthma is expressed as an ordinal categorical**  
 143 **variable with levels of severity 0-4. Model fit is compared using AIC<sup>a</sup>. Data is from the**  
 144 **NHANES 2011-2014 survey cycles.**  
 145

| <b>Ordinal logistic regression<sup>b</sup></b> | <b>OR (95% CI)</b> | <b>AIC</b> |
|------------------------------------------------|--------------------|------------|
| <b>for asthma severity 0-4</b>                 |                    |            |
| All ages                                       |                    |            |
| <i>Toxoplasma gondii</i>                       |                    |            |
| Positive                                       | 0.90 (0.83-0.97)   | 14780      |
| <b>Age 6-9</b>                                 |                    |            |
| <i>Toxoplasma gondii</i>                       |                    |            |
| Positive                                       | 0.75 (0.36-1.58)   | 1235       |
| <b>Age 10-19</b>                               |                    |            |
| <i>Toxoplasma gondii</i>                       |                    |            |
| Positive                                       | 0.78 (0.80- 1.21)  | 3742       |
| <b>Age 20-29</b>                               |                    |            |
| <i>Toxoplasma gondii</i>                       |                    |            |
| Positive                                       | 0.91 (0.59-1.40)   | 2019       |
| <b>Age 30-39</b>                               |                    |            |
| <i>Toxoplasma gondii</i>                       |                    |            |
| Positive                                       | 1.24 (0.96-1.60)   | 1828       |
| <b>Age 40-49</b>                               |                    |            |
| <i>Toxoplasma gondii</i>                       |                    |            |
| Positive                                       | 0.83 (0.60-1.14)   | 1560       |
| <b>Age 50-59</b>                               |                    |            |
| <i>Toxoplasma gondii</i>                       |                    |            |
| Positive                                       | 0.81 (0.60-1.09)   | 1524       |
| <b>Age 60-69</b>                               |                    |            |
| <i>Toxoplasma gondii</i>                       |                    |            |
| Positive                                       | 1.31 (0.95-1.81)   | 1836       |
| <b>Age 70-80+</b>                              |                    |            |
| <i>Toxoplasma gondii</i>                       |                    |            |
| Positive                                       | 1.03 (0.86-1.22)   | 1836       |

146 <sup>a</sup>Akaike information criterion. <sup>b</sup>Model incorporates complex survey design and is adjusted for gender, poverty index,  
 147 race, poverty index\*race, country of birth, number of children in the household, number of children in the  
 148 household\*poverty index, and education of the household reference person.

149  
 150  
 151 Analyses were performed in R (version 4.3.1)(27). We used a design-based analysis approach  
 152 to account for survey weights and complex survey design using the CRAN survey package

153 (version 4.2-1)(28). Descriptive statistics are presented in Table 1; reported frequencies are based  
154 on the unweighted analytic sample while the percentages account for complex survey design.

155 Among all subjects, country of birth was missing for 0.03%, education level was missing for  
156 3.29%, poverty index was missing for 6.86%, and age was missing for 19.0%. We assumed the  
157 data were missing at random (MAR) and imputed the missing covariate data using five  
158 imputations (29). All analyses were conducted on each imputed data set and results were pooled  
159 using Rubin's rules (30). We compared results using imputed data with those obtained from a  
160 complete case analysis.

161 We fit an ordinal logistic regression model to estimate odds ratios (OR) and 95% confidence  
162 intervals (CI) of the unadjusted association between *T. gondii* infection and asthma severity (0-  
163 4), and the association after adjusting for all confounders (Table 2). For comparison, we fit a  
164 logistic regression model to estimate the unadjusted and fully adjusted association between *T.*  
165 *gondii* infection and asthma as a bivariate outcome, "Yes" or "No".

166

167 **Table 2. Odds ratios (OR) and 95% confidence intervals (CI) for the unadjusted and**  
168 **adjusted relationship between *Toxoplasma gondii* infection status and asthma in the U.S.**  
169 **non-institutionalized civilian population age 6 years and older. Asthma is expressed as an**  
170 **ordinal categorical variable with levels of severity 0-4 in an ordinal logistic regression**  
171 **model and as a bivariate yes/no variable in a logistic regression model. Data is from the**  
172 **NHANES 2011-2014 survey cycles.<sup>a</sup>**  
173

|                                                                 | <b>Unadjusted</b><br>OR (95% CI) | <b>Adjusted<sup>b</sup></b><br>OR (95% CI) |
|-----------------------------------------------------------------|----------------------------------|--------------------------------------------|
| <hr/> Ordinal logistic regression for asthma severity 0-4 <hr/> |                                  |                                            |
| <i>Toxoplasma gondii</i>                                        |                                  |                                            |
| Negative                                                        | reference                        | reference                                  |
| Positive                                                        | 0.90 (0.83-0.97)                 | 1.00 (0.91 - 1.10)                         |
| <hr/>                                                           |                                  |                                            |
| Logistic regression for asthma yes/no <hr/>                     |                                  |                                            |
| <i>Toxoplasma gondii</i>                                        |                                  |                                            |
| Negative                                                        | reference                        | reference                                  |
| Positive                                                        | 0.82 (0.7-0.95)                  | 1.02(0.85-1.21)                            |

174 <sup>a</sup>Survey design is accounted for in the analysis and missing covariate data is addressed using multiple imputation.  
175 <sup>b</sup>Model is adjusted for gender, age, poverty index, race, poverty index\*race, country of birth, number of children in  
176 the household, number of children in the household\*poverty index, and education of the household reference person.

## 177 **RESULTS**

178 Of the 12,620 subjects 6 years of age or older tested for *T. gondii* infection, 10.8% were  
179 seropositive and 89.2% were seronegative. Most subjects (83.5%) reported that they had never  
180 been told that they had asthma (level 0), while 16.5% reported varying degrees of asthma  
181 severity (levels 1-4). Asthma prevalence varied by age category (Fig 3), with the highest  
182 prevalence found in 10–29-year-olds and the lowest in subjects 80 years and older. Prevalence of  
183 *T. gondii* infection increased with age (Fig 3). No statistically significant difference was detected  
184 for seroprevalence of *T. gondii* across the five levels of asthma severity ( $p = 0.140$ ). Significant  
185 unadjusted associations between asthma and the covariates gender ( $p = 0.036$ ), age category ( $p =$   
186  $0.019$ ), poverty index ( $p = 0.003$ ), and race ( $p = 0.024$ ) are presented in Table 1.

187 No significant relationship was detected between *T. gondii* infection and asthma. A complete  
188 case analysis using the unadjusted ordinal regression model returned an OR of 0.89 (95% CI =  
189 0.79-1.01), suggesting an insignificant protective effect of *T. gondii* infection. Adjusting for all  
190 confounders, the complete case model returned an OR of 1.02 (95% CI 0.87-1.19). Using  
191 multiple imputation to account for missing covariate data, the unadjusted regression model  
192 returned an OR of 0.90 (95% CI = 0.83-0.97), suggesting a protective effect of *T. gondii*  
193 infection, but the fully adjusted model returned an OR of 1.00 (95% CI = 0.91-1.10), confirming  
194 there was no detected association between *T. gondii* infection and asthma (Table 2). The  
195 unadjusted and adjusted logistic regression models evaluating asthma as a bivariate outcome  
196 variable (Yes/No) yielded similar results (Table 2). The ordinal model fit the data better than the  
197 logistic model according to the AIC values.

198 Regression analyses stratified by age category suggested that there is some effect modification  
199 by age. Model fit, evaluated using AIC, was much better within age categories when compared  
200 to the full model using all age categories (Table 3). The association between *T. gondii* infection  
201 and asthma severity also varied across age categories, but within each category, the association  
202 remained insignificant (Table 3).

## 203 **DISCUSSION**

204 The NHANES data has some limitations. An estimated 20% of asthma cases are undiagnosed  
205 in the U.S. and therefore not captured by the NHANES (31), which could bias our results.  
206 Additionally, the data are cross-sectional and cannot capture temporal relationships between  
207 exposure and outcome. If *T. gondii* exerts an effect on asthma over only a short period post-  
208 infection, our analysis might fail to detect this. Furthermore, asthma is a syndrome comprised of  
209 several diseases, not all of which are associated with atopy (4). Because *T. gondii*'s potential

210 impact on asthma is postulated to occur via immune system modulation (6,32), the inability to  
211 distinguish atopy-related asthma from other types might reduce the sensitivity of our analysis.

212 Model fit was improved when stratified by age category, and ORs appeared to vary across age  
213 categories but remained statistically insignificant (Table 3). The non-linear relationship between  
214 asthma and age (Fig 3) might contribute to this effect.

215 For all adjusted regression models, no significant relationship was detected between *T. gondii*  
216 infection and asthma. These findings are consistent with two other large cross-sectional studies  
217 in Scotland and Australia that found no association between *T. gondii* seropositivity and asthma  
218 (14,33). While our results appear to contradict several case-control studies that have found a  
219 protective effect of *T. gondii* infection on allergy symptoms and asthma, these studies did not  
220 consider confounders which could impact exposure to a diversity of microorganisms and their  
221 products, such as socioeconomic status or number of siblings (34,35). *Toxoplasma gondii* is,  
222 therefore, likely a marker for the protective effect of exposure to a diversity of microbial  
223 organisms and their products early in life, but may not have any causal effect on this  
224 phenomenon, or may not be important when considered in isolation (1,7,15,36).

225 **ACKNOWLEDGMENTS**

226

227 The author thanks Michael Asamoah-Boaheng who reviewed preliminary drafts of this  
228 manuscript.

## 229 WORKS CITED

- 230 1. Dannemiller KC, Gent JF, Leaderer BP, Peccia J. Indoor microbial communities: Influence  
231 on asthma severity in atopic and nonatopic children. *J Allergy Clin Immunol*. 2016  
232 Jul;138(1):76-83.e1.
- 233 2. Eder W, Ege MJ, von Mutius E. The Asthma Epidemic. *N Engl J Med*. 2006 Nov  
234 23;355(21):2226–35.
- 235 3. Most Recent National Asthma Data | CDC [Internet]. 2023 [cited 2023 Nov 12]. Available  
236 from: [https://www.cdc.gov/asthma/most\\_recent\\_national\\_asthma\\_data.htm](https://www.cdc.gov/asthma/most_recent_national_asthma_data.htm)
- 237 4. Nurmagambetov T, Kuwahara R, Garbe P. The Economic Burden of Asthma in the United  
238 States, 2008–2013. *Ann Am Thorac Soc*. 2018 Mar;15(3):348–56.
- 239 5. Liu AH. Revisiting the hygiene hypothesis for allergy and asthma. *J Allergy Clin Immunol*.  
240 2015 Oct;136(4):860–5.
- 241 6. Fenoy IM, Sánchez VR, Soto AS, Picchio MS, Martin V, Goldman A. *Toxoplasma gondii*  
242 infection modulate systemic allergic immune response in BALB/c mice. *Exp Parasitol*. 2015  
243 Jul;154:47–50.
- 244 7. Jones JL, Kruszon-Moran D, Elder S, Rivera HN, Press C, Montoya JG, et al. *Toxoplasma*  
245 *gondii* Infection in the United States, 2011–2014. *Am J Trop Med Hyg*. 2018 Feb  
246 7;98(2):551–7.
- 247 8. Wagner A, Förster-Waldl E, Garner-Spitzer E, Schabussova I, Kundi M, Pollak A, et al.  
248 Immunoregulation by *Toxoplasma gondii* infection prevents allergic immune responses in  
249 mice. *Int J Parasitol*. 2009 Mar;39(4):465–72.
- 250 9. NHANES Questionnaires, Datasets, and Related Documentation [Internet]. [cited 2023 Oct  
251 15]. Available from: <https://wwwn.cdc.gov/nchs/nhanes/>
- 252 10. Government of Canada IAP on RE. Tri-Council Policy Statement: Ethical Conduct for  
253 Research Involving Humans – TCPS 2 (2018) [Internet]. 2019 [cited 2023 Oct 11].  
254 Available from: [https://ethics.gc.ca/eng/policy-politique\\_tcps2-eptc2\\_2018.html](https://ethics.gc.ca/eng/policy-politique_tcps2-eptc2_2018.html)
- 255 11. Human Research Policy. 2019;
- 256 12. Montoya JG. Laboratory diagnosis of *Toxoplasma gondii* infection and toxoplasmosis. *J*  
257 *Infect Dis*. 2002 Feb 15;185 Suppl 1:S73-82.
- 258 13. Aydogan M, Ozen A, Akkoc T, Eifan AO, Aktas E, Deniz G, et al. Risk factors for  
259 persistence of asthma in children: 10-year follow-up. *J Asthma*. 2013 Nov 1;50(9):938–44.
- 260 14. Bodner C, Anderson WJ, Reid TS, Godden DJ. Childhood exposure to infection and risk of  
261 adult onset wheeze and atopy. *Thorax*. 2000 May 1;55(5):383–7.

- 262 15. Iqbal S, Oraka E, Chew GL, Flanders WD. Association Between Birthplace and Current  
263 Asthma: The Role of Environment and Acculturation. *Am J Public Health*. 2014  
264 Feb;104(Suppl 1):S175–82.
- 265 16. Mareze M, Benitez ADN, Brandão APD, Pinto-Ferreira F, Miura AC, Martins FDC, et al.  
266 Socioeconomic vulnerability associated to *Toxoplasma gondii* exposure in southern Brazil.  
267 Carvalho LH, editor. *PLOS ONE*. 2019 Feb 14;14(2):e0212375.
- 268 17. Strachan DP. Hay fever, hygiene, and household size. *BMJ*. 1989 Nov 18;299(6710):1259–  
269 60.
- 270 18. Wei HX, He C, Pi Y, Lindsay D, Peng HJ. Relationship Between Cat Contact and Infection  
271 by *Toxoplasma gondii* in Humans: A Meta-Analysis. *Comp Parasitol*. 2016 Jan 1;83:11–9.
- 272 19. Cook AJ, Gilbert RE, Buffolano W, Zufferey J, Petersen E, Jenum PA, et al. Sources of  
273 toxoplasma infection in pregnant women: European multicentre case-control study.  
274 European Research Network on Congenital Toxoplasmosis. *BMJ*. 2000 Jul  
275 15;321(7254):142–7.
- 276 20. Stray-Pedersen B, Lorentzen-Styr AM. Epidemiological aspects of *Toxoplasma* infections  
277 among women in Norway. *Acta Obstet Gynecol Scand*. 1980;59(4):323–6.
- 278 21. Wallace MR, Rossetti RJ, Olson PE. Cats and toxoplasmosis risk in HIV-infected adults.  
279 *JAMA*. 1993 Jan 6;269(1):76–7.
- 280 22. Marković-Denić L, Stopić M, Bobić B, Nikolić V, Djilas I, Srzentić SJ, et al. Factors  
281 Associated with *Toxoplasma gondii* Seroprevalence in Pregnant Women: A Cross-Sectional  
282 Study in Belgrade, Serbia. *Pathogens*. 2023 Oct 13;12(10):1240.
- 283 23. Kapperud G, Jenum PA, Stray-Pedersen B, Melby KK, Eskild A, Eng J. Risk Factors for  
284 *Toxoplasma gondii* Infection in Pregnancy: Results of a Prospective Case-Control Study in  
285 Norway. *Am J Epidemiol*. 1996 Aug 15;144(4):405–12.
- 286 24. Ahmed AE, AL-Jahdali H, AL-Harbi A, Khan M, Ali Y, Al Shimemeri A, et al. Factors  
287 associated with poor asthma control among asthmatic patient visiting emergency department.  
288 *Clin Respir J*. 2014;8(4):431–6.
- 289 25. Matricardi PM, Rosmini F, Panetta V, Ferrigno L, Bonini S. Hay fever and asthma in  
290 relation to markers of infection in the United States. *J Allergy Clin Immunol*. 2002  
291 Sep;110(3):381–7.
- 292 26. ASPE [Internet]. [cited 2023 Oct 15]. Prior HHS Poverty Guidelines and Federal Register  
293 References. Available from: <https://aspe.hhs.gov/topics/poverty-economic-mobility/poverty-guidelines/prior-hhs-poverty-guidelines-federal-register-references>  
294
- 295 27. How to Cite R and R Packages. 00:00 + UTC [cited 2023 Nov 12]; Available from:  
296 <https://ropensci.org/blog/2021/11/16/how-to-cite-r-and-r-packages/>



- 297 28. survey citation info [Internet]. [cited 2023 Nov 12]. Available from: [https://cran.r-](https://cran.r-project.org/web/packages/survey/citation.html)  
298 project.org/web/packages/survey/citation.html
- 299 29. Sterne JAC, White IR, Carlin JB, Spratt M, Royston P, Kenward MG, et al. Multiple  
300 imputation for missing data in epidemiological and clinical research: potential and pitfalls.  
301 BMJ. 2009 Sep 1;338(jun29 1):b2393–b2393.
- 302 30. Introduction. In: Multiple Imputation for Nonresponse in Surveys [Internet]. John Wiley &  
303 Sons, Ltd; 1987 [cited 2023 Nov 13]. p. 1–26. Available from:  
304 <https://onlinelibrary.wiley.com/doi/abs/10.1002/9780470316696.ch1>
- 305 31. Bruzzese JM, Kingston S, Falletta KA, Bruzelius E, Poghosyan L. Individual and  
306 Neighborhood Factors Associated with Undiagnosed Asthma in a Large Cohort of Urban  
307 Adolescents. J Urban Health Bull N Y Acad Med. 2019 Apr;96(2):252–61.
- 308 32. Fenoy I, Giovannoni M, Batalla E, Martin V, Frank FM, Piazzon I, et al. *Toxoplasma gondii*  
309 infection blocks the development of allergic airway inflammation in BALB/c mice. Clin Exp  
310 Immunol. 2009 Jan 6;155(2):275–84.
- 311 33. Molan A, Nosaka K, Hunter M, Wang W. Seroprevalence and associated risk factors of  
312 *Toxoplasma gondii* infection in a representative Australian human population: The Busselton  
313 health study. Clin Epidemiol Glob Health. 2020 Sep;8(3):808–14.
- 314 34. Ellertsen LK, Hetland G, Løvik M. Specific IgE to Respiratory Allergens and IgG  
315 Antibodies to *Toxoplasma gondii* and *Streptococcus pneumoniae* in Norwegian Military  
316 Recruits. Scand J Immunol. 2008 May;67(5):496–500.
- 317 35. Elkholy A, Elsadek A, Eraky M, ElBishry M, Mohamed B. Seropositivity of *Toxoplasma*  
318 *gondii* in Children with Bronchial Asthma at Benha University Hospital, Egypt. Zagazig  
319 Univ Med J. 2021 Nov 4;0(0):0–0.
- 320 36. von Mutius E. Allergies, infections and the hygiene hypothesis--the epidemiological  
321 evidence. Immunobiology. 2007;212(6):433–9.
- 322

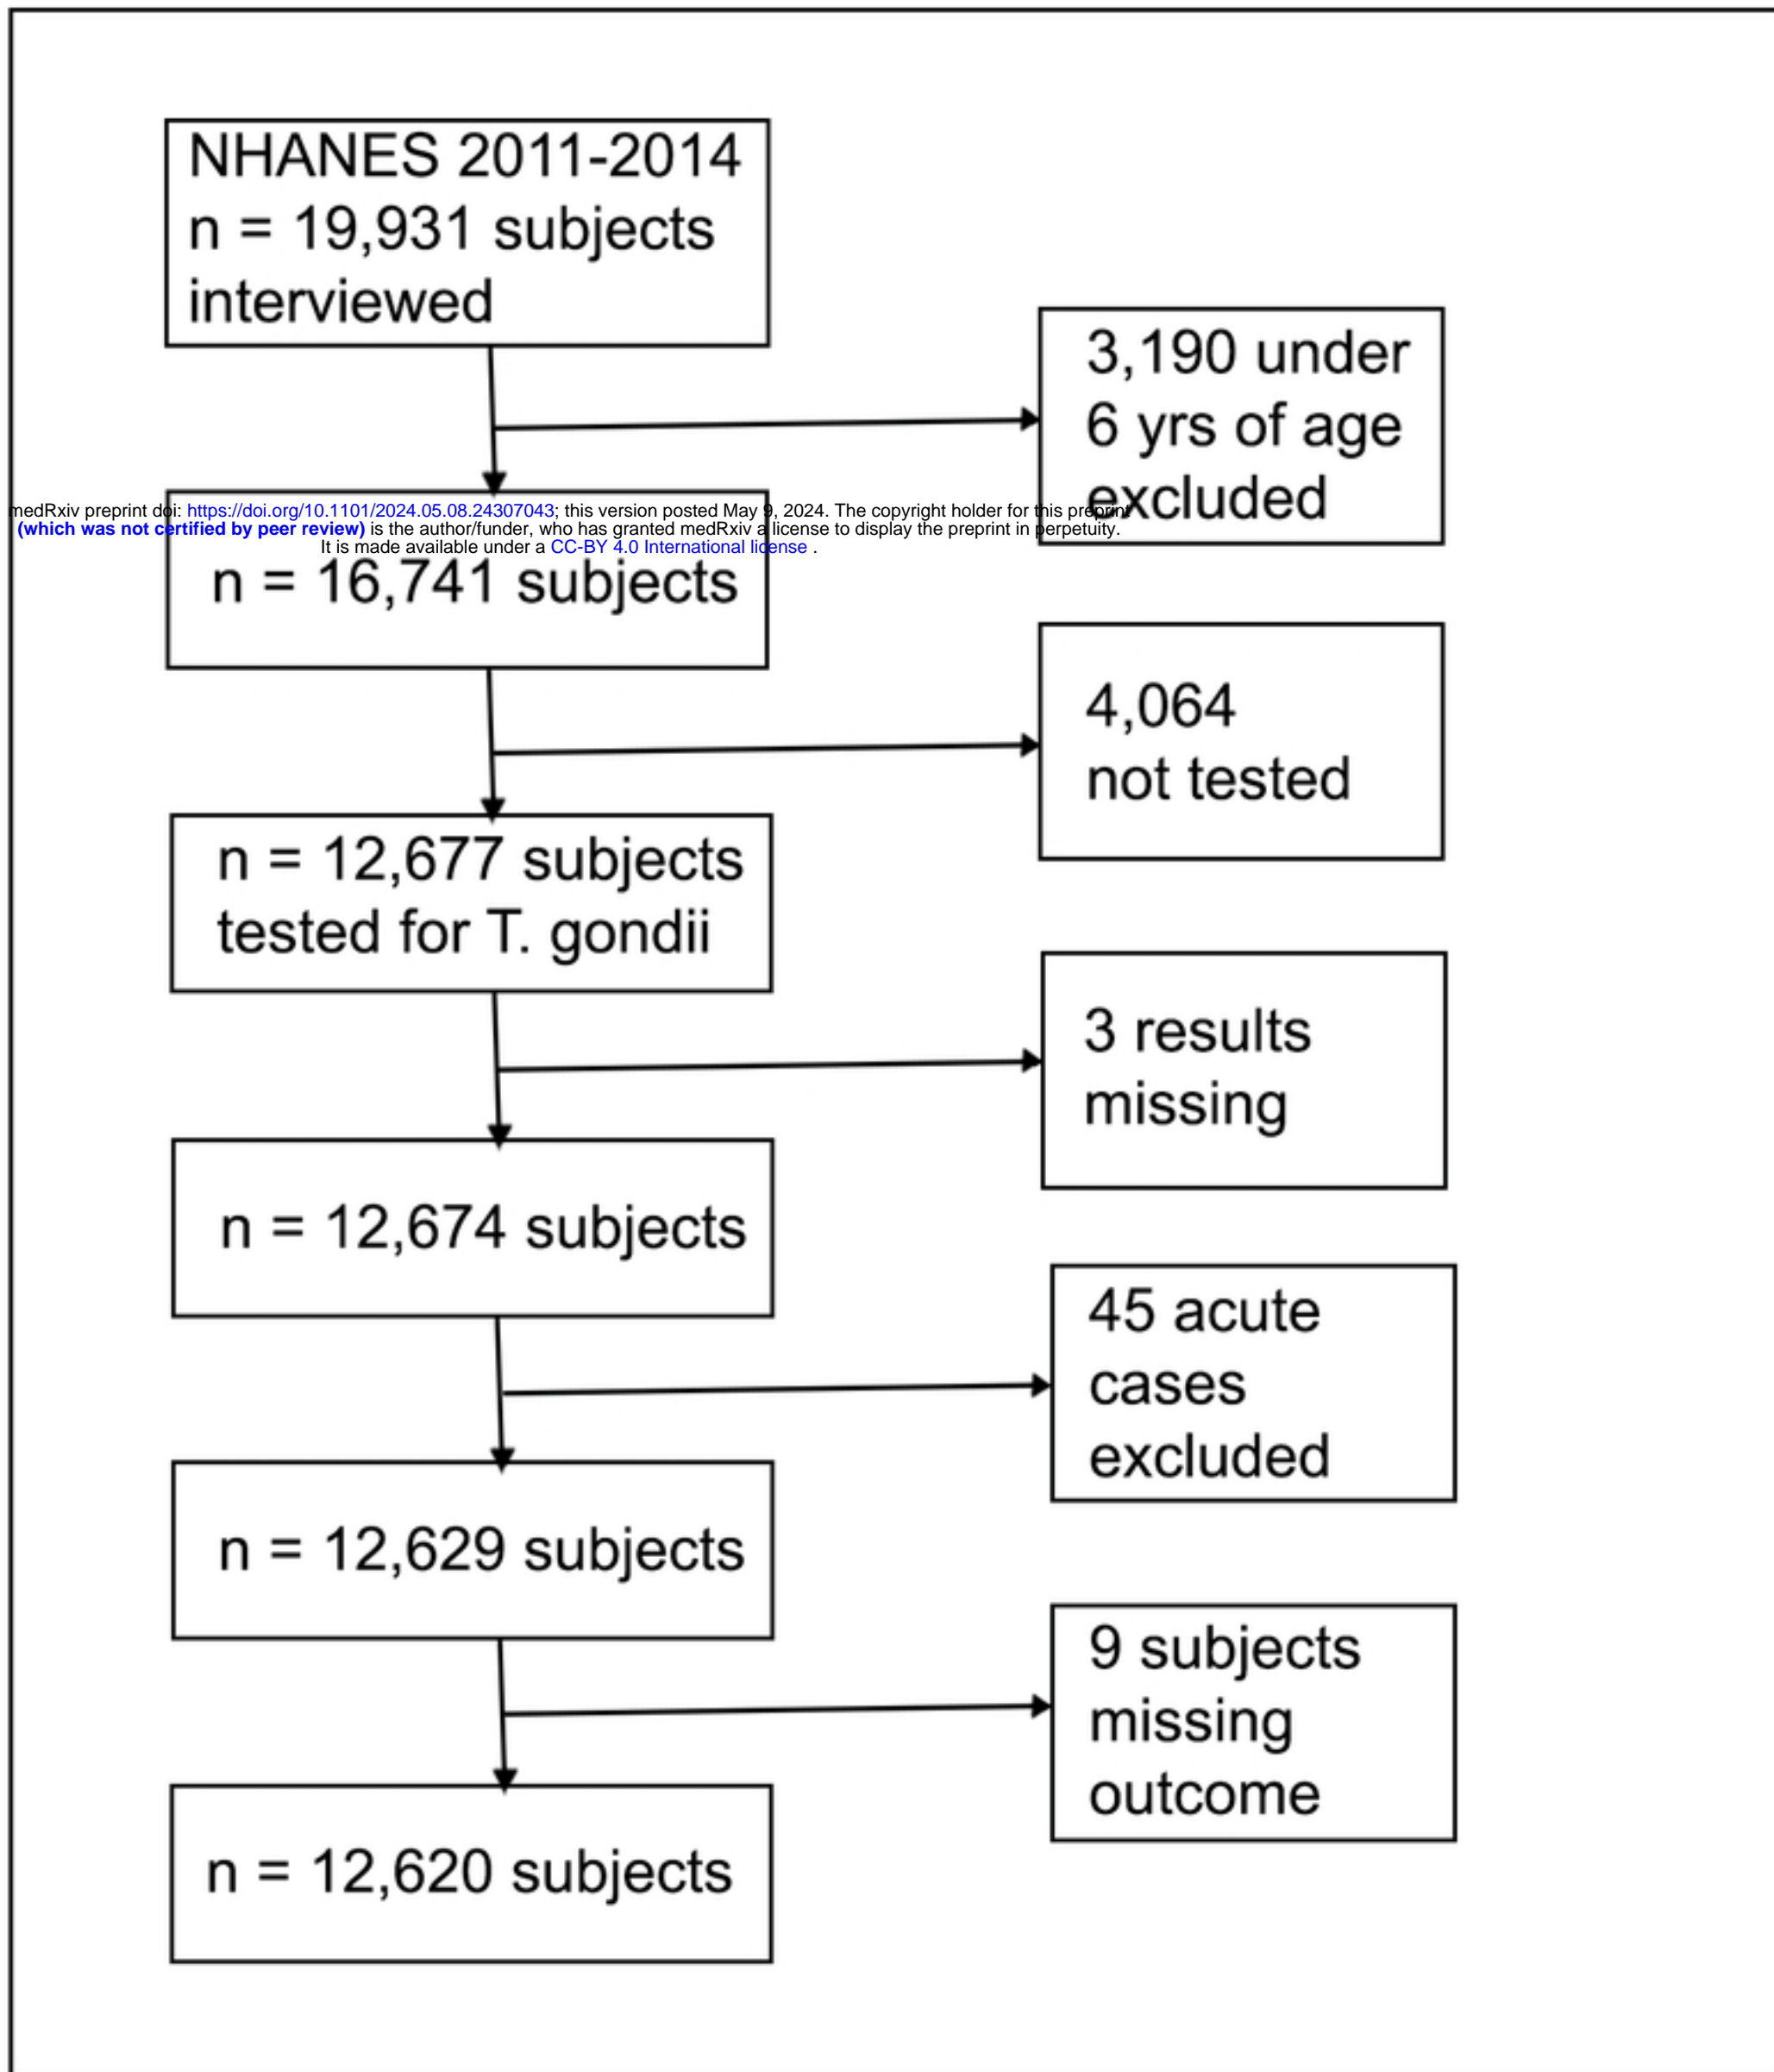

Figure 1

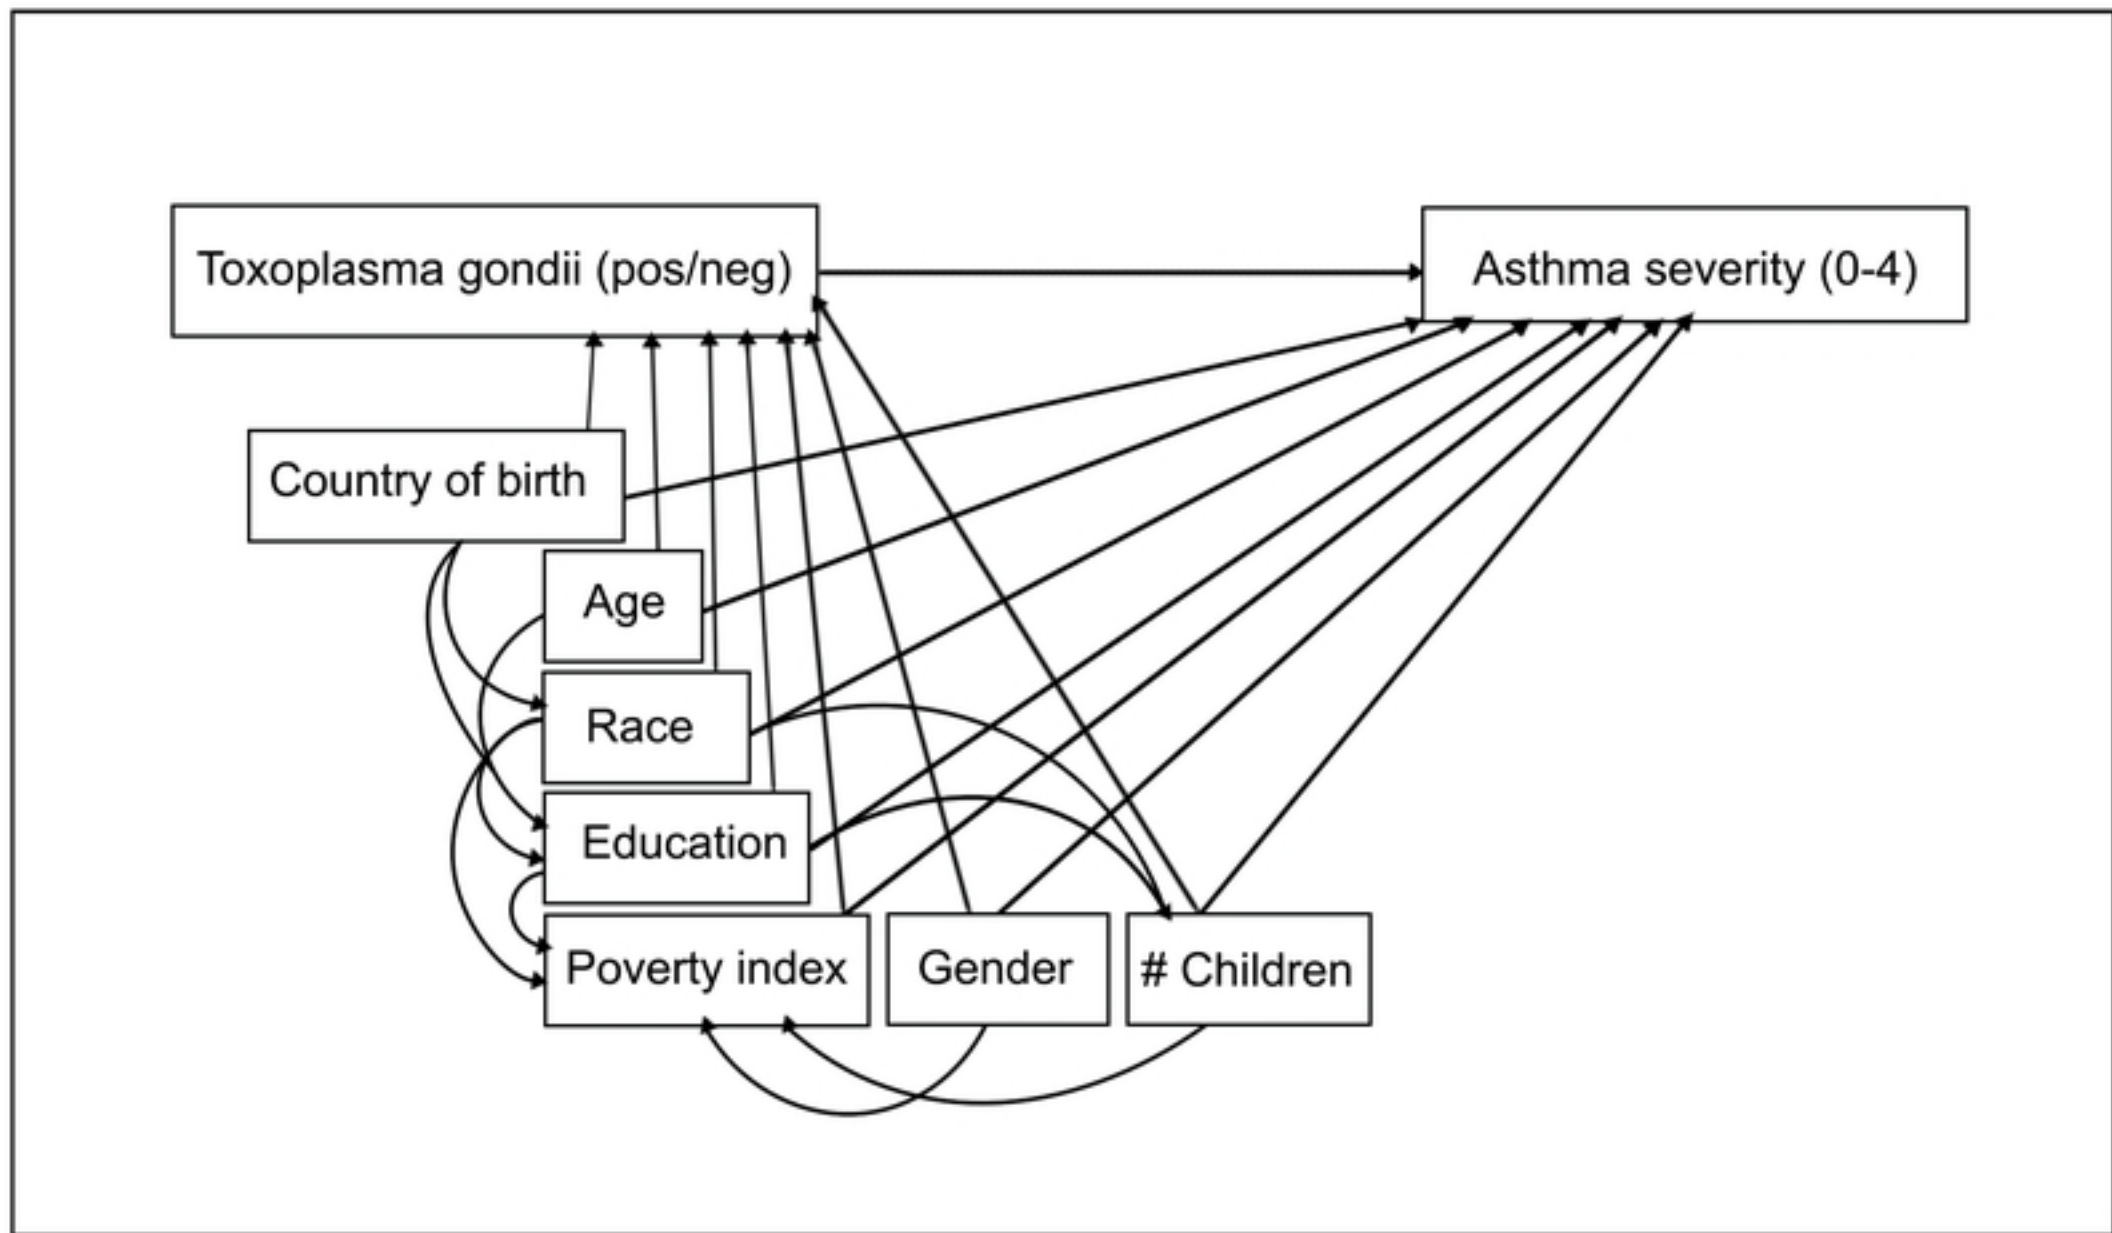

Figure 2

Toxoplasma gondii infection prevalence by age category

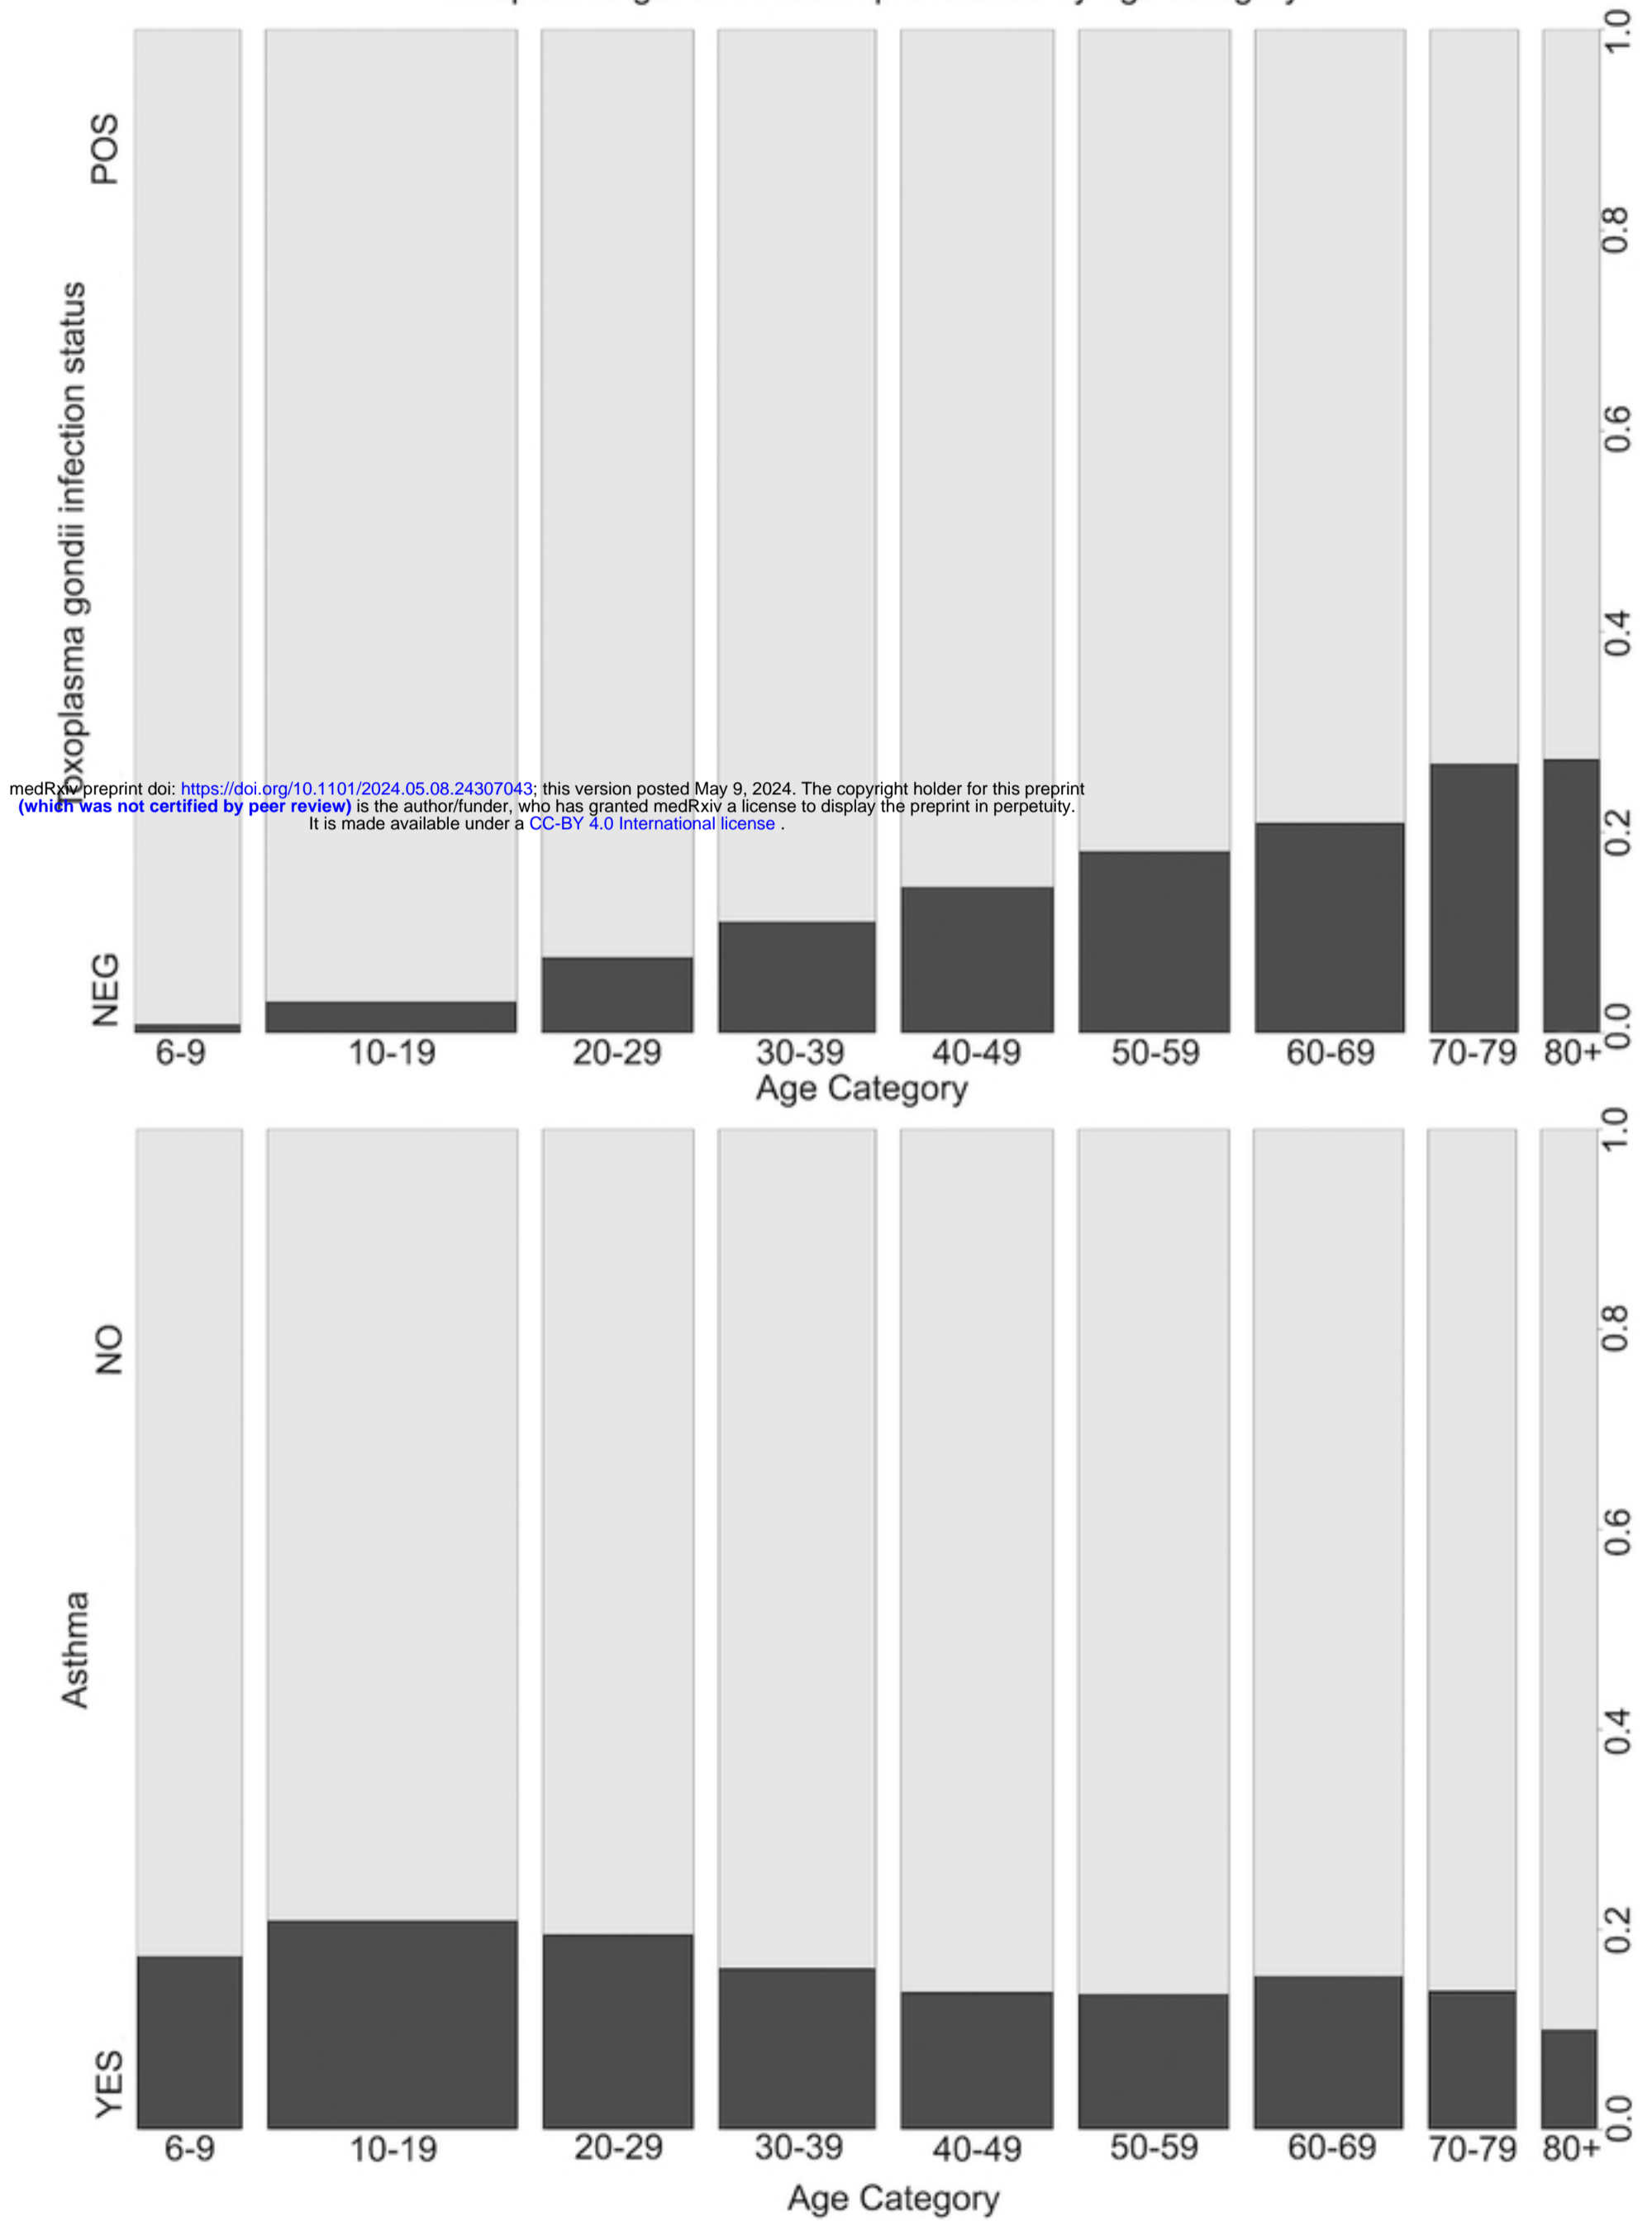

medRxiv preprint doi: <https://doi.org/10.1101/2024.05.08.24307043>; this version posted May 9, 2024. The copyright holder for this preprint (which was not certified by peer review) is the author/funder, who has granted medRxiv a license to display the preprint in perpetuity. It is made available under a [CC-BY 4.0 International license](https://creativecommons.org/licenses/by/4.0/).

Figure 3
